# Supplementary material for: Photothermally induced in situ double emulsion separation by a carbon nanotube/poly(N-isopropylacrylamide) modified membrane with superwetting properties
Source: Royal Society of Chemistry journal article supplement (doi:10.1039/d0ta02919j), 2020-01-01
Supplement: d0ta02919j1.pdf [file d0ta02919j1.pdf]

## **Electronic Supplementary Information (ESI)**

### **Photothermal Induced In-situ Double Emulsion Separation by a Carbon Nanotube/Poly(N-isopropylacrylamide) Modified Membrane with Superwetting Property**

Ruixiang Qu,<sup>a</sup> Xiangyu Li,<sup>a</sup> Weifeng Zhang,<sup>b</sup> Yanan Liu,<sup>a</sup> Huajun Zhai,<sup>a</sup> Yen Wei<sup>a</sup>  
and Lin Feng <sup>a\*</sup>

<sup>a</sup>Department of Chemistry, Tsinghua University, Beijing 100084, P. R. China

<sup>b</sup>Hangzhou Innovation Research Institute of Beihang University, Hangzhou 310051, P.  
R. China.

\*Corresponding author: fl@mail.tsinghua.edu.cn

## I. Calculation

### The specific simplify process of the Cassie-Baxter equation:

The Cassie-Baxter equation:

$$\cos\theta = f_1\cos\theta_1 + f_2\cos\theta_2 \dots\dots\dots(S1)$$

Substituting  $f_1 + f_2 = 1$  into Equation S1, we obtained Equation S2 as follows

$$\cos\theta = f_1\cos\theta_1 + (1 - f_1)\cos\theta_2 \dots\dots\dots(S2)$$

$f_1$ : the apparent area fraction of IAHB

$f_2$ : the apparent area fraction of IEHB

$\cos\theta_1$ : the cosine of the WCA on IAHB

$\cos\theta_2$ : the cosine of the WCA on IEHB

$\cos\theta$ : the cosine of the WCA on the material

The WCA on IEHB was  $0^\circ$ , so the Equation S2 can be written as:

$$\cos\theta = f_1\cos\theta_1 + 1 - f_1 \dots\dots\dots(S3)$$

As a result,

$$f_1 = \frac{1 - \cos\theta}{1 - \cos\theta_1} \dots\dots\dots(S4)$$

In this work, the WCA of IAHB part is between  $150^\circ$ - $180^\circ$ .

Substituting  $\theta_1=150^\circ$  into Equation S4, we obtained:

$$f_1 = \frac{1 - \cos\theta}{1.866} \dots\dots\dots(S5)$$

Substituting  $\theta_1=180^\circ$  into Equation S4, we obtained:

$$f_1 = \frac{1 - \cos\theta}{2} \dots\dots\dots(S6)$$

Combing Equation S5 and Equation S6 together, the final interval was obtained

$$[f_1 \in (0,1): \frac{1 - \cos\theta}{2} < f_1 < \frac{1 - \cos\theta}{1.866}] \dots\dots\dots(S7)$$

## II. Supporting Figures and Table

**Table S1:** The comparison of previous excellent works with our work. The PNIPAAm/CNT@PVDF provided a novel responsive way as well as an approach to treat double emulsion, while the separation efficiency was as good as the previous works.

|                                                  | Response approach                  | Separation object                        | Separation efficiency | Ref       |
|--------------------------------------------------|------------------------------------|------------------------------------------|-----------------------|-----------|
| Aminoazobenzene@Ag modified mesh                 | Photo response                     | Immiscible oil/water separation          | >99.9%                | 20        |
| PMMA-b-PNIPAAm fibrous membrane                  | Thermal response                   | Immiscible oil/water separation          | >98.5%                | 38        |
| TiO <sub>2</sub> /ODP based mesh                 | Photo response                     | Dye polluted oil/water separation        | unmentioned           | 39        |
| PFOA modified kaolin material                    | PH response                        | Surfactant stablized emulsion separation | >99%                  | 40        |
| Au@PDA/PEPA@nylon                                | PH response                        | Surfactant stablized emulsion separation | >96%                  | 35        |
| 3D hollow porous rape pollens                    | Calcination and steam modification | Surfactant stablized emulsion separation | >98.5%                | 36        |
| Co(OH) <sub>2</sub> @CMF                         | Liquid responsive                  | Surfactant stablized emulsion separation | >97.5%                | 37        |
| Copolymer/SiO <sub>2</sub> -coated cotton fabric | PH response                        | Surfactant stablized Emulsion separation | >98%                  | 41        |
| PNIPAAm/CNT@PVDF                                 | Photothermal response              | Double emulsion separation               | >97.5%                | This work |

**Table S2:** The corresponding calculating process of the ratio change of IAHB under different irradiation times.

| <b>Irradiation time (s)</b> | <b>WCA (°)</b> | <b>cos<math>\theta</math></b> | <b>(1-cos<math>\theta</math>)/2</b> | <b>(1-cos<math>\theta</math>)/1.866</b> |
|-----------------------------|----------------|-------------------------------|-------------------------------------|-----------------------------------------|
| <b>0</b>                    | 0              | 1                             | 0                                   | 0                                       |
| <b>5</b>                    | 105.4          | -0.26556                      | 0.63278                             | 0.66608                                 |
| <b>10</b>                   | 131.8          | -0.66653                      | 0.83326                             | 0.87712                                 |
| <b>15</b>                   | 140.8          | -0.77494                      | 0.88747                             | 0.93418                                 |
| <b>20</b>                   | 137.4          | -0.73610                      | 0.86805                             | 0.91374                                 |
| <b>25</b>                   | 146.3          | -0.83195                      | 0.91598                             | 0.96419                                 |
| <b>30</b>                   | 153.6          | -0.89571                      | 0.94786                             | 0.99774                                 |
| <b>35</b>                   | 152.6          | -0.88782                      | 0.94391                             | 0.99359                                 |
| <b>40</b>                   | 150.4          | -0.86949                      | 0.93475                             | 0.98394                                 |

**Table S3:** The summary of the abbreviations used in the manuscript.

| <b>Abbreviations</b> | <b>Full name</b>                         |
|----------------------|------------------------------------------|
| CNT                  | carbon nanotube                          |
| PNIPAAm              | Poly(N-isopropylacrylamide)              |
| PVDF                 | Poly(vinylidene fluoride)                |
| LCST                 | the lowest critical solution temperature |
| IEHB                 | intermolecular hydrogen bond             |
| IAHB                 | intramolecular hydrogen bond             |
| ST                   | surface temperature                      |
| WCA                  | water contact angle                      |
| OCA                  | oil contact angle                        |
| UOCA                 | underwater oil contact angle             |
| Abs                  | heat absorption                          |
| For                  | heat formation                           |
| Rel                  | heat release                             |
| Con                  | heat consume                             |
| O/W/O emulsion       | oil-in-water-in-oil emulsion             |
| W/O/W emulsion       | water-in-oil-in-water emulsion           |

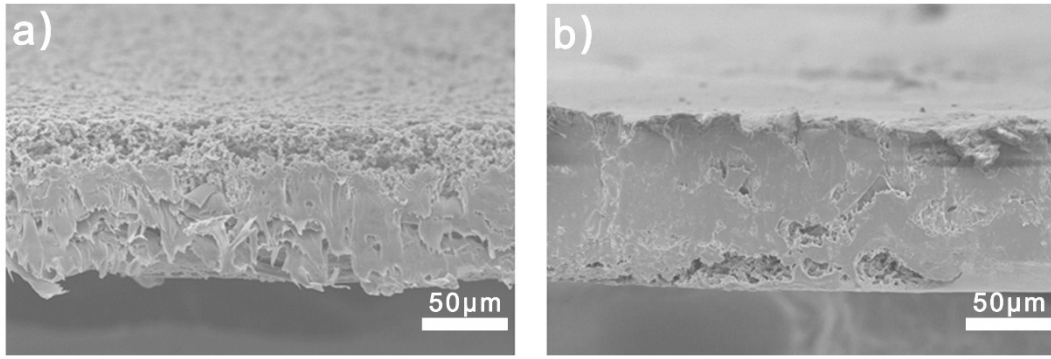

**Figure S1:** The cross section SEM images of a) original PVDF and b) PNIPAAm/CNT@PVDF, indicating the successfully modification of PNIPAAm and CNT.

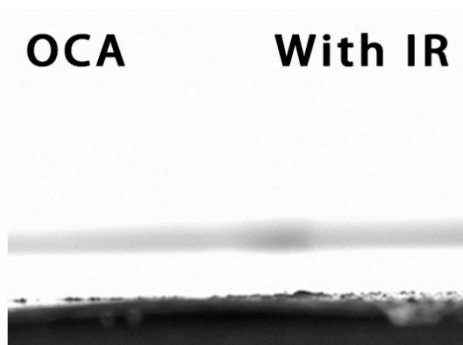

**Figure S2:** The OCA of the as-prepared membrane under IR was 0°, indicating the superoleophilic property

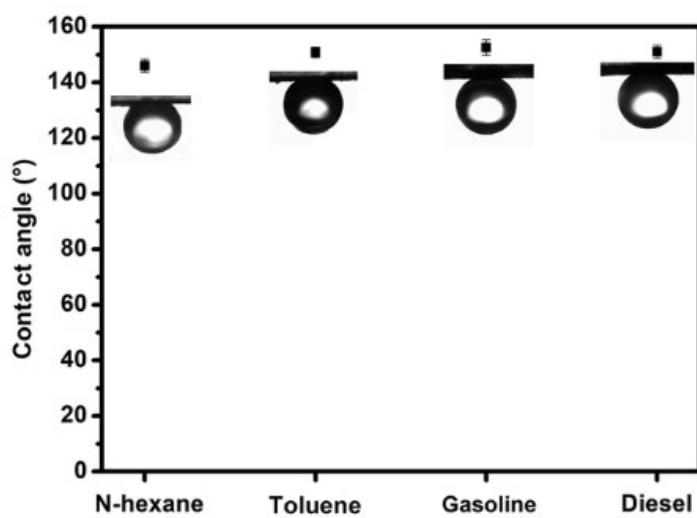

**Figure S3:** The underwater light oil contact angles of four different oils without IR. The PNIPAAm/CNT@PVDF was underwater superoleophobic without IR.

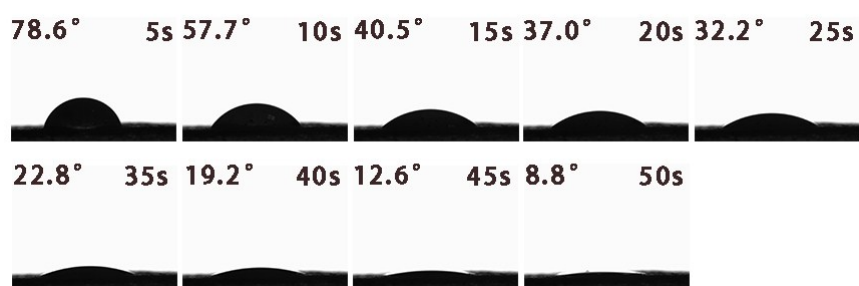

**Figure S4:** The wetting speed of water droplet on the membrane without IR was slow, which could be ascribed to the inevitable intermolecular hydrogen bonding formation process.



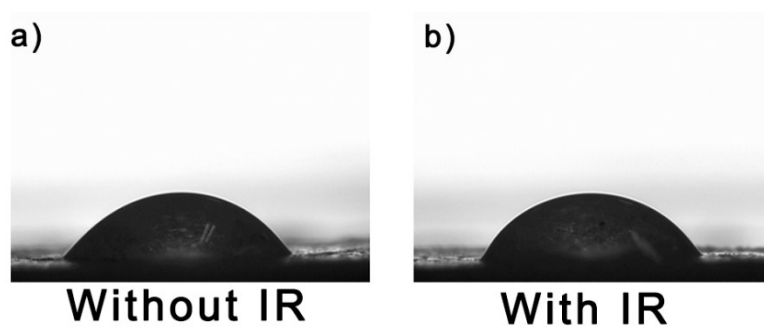

**Figure S5:** The WCA of the CNT@PVDF. The material didn't show responsive property without PNIPAAm.

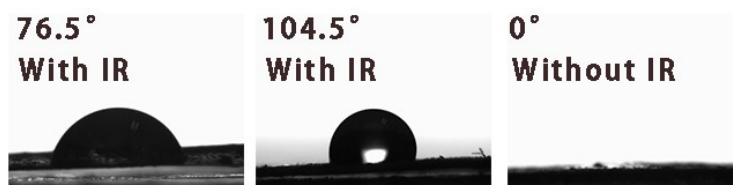

**Figure S6:** The wetting behavior of PNIPAAm@PVDF under IR was uneven, because the absence of CNT limited the photo-thermal conversion property.

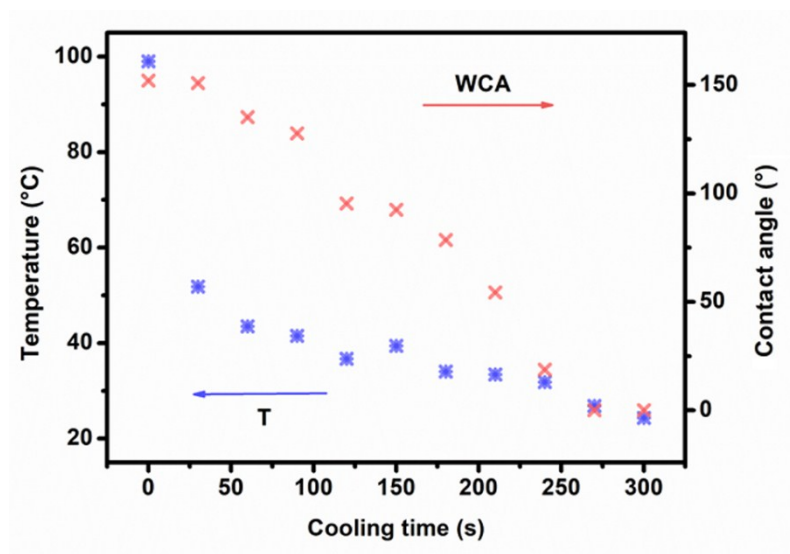

**Figure S7:** The cooling down process of PNIPAAm/CNT@PVDF after IR illumination. The temperature and contact angle decreased with the cooling time increased.

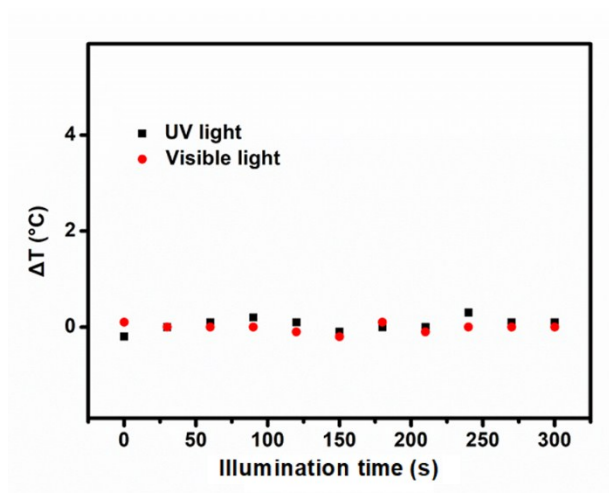

**Figure S8:** The temperature of PNIPAAm/CNT@PVDF kept unchanged under UV light and visible light.

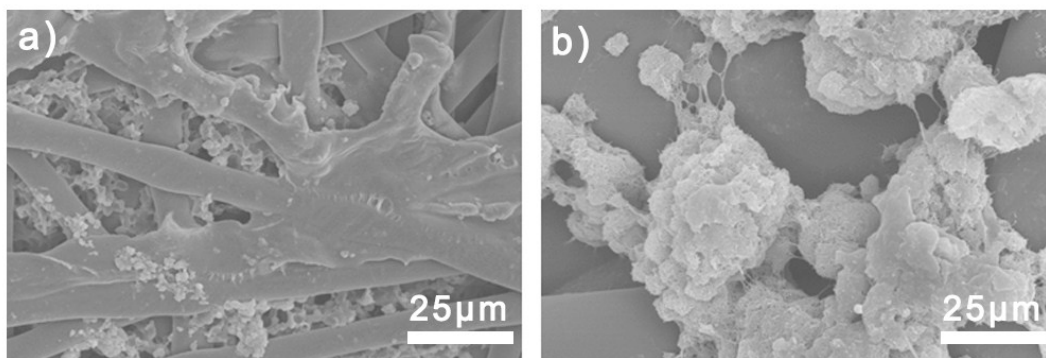

**Figure S9:** The SEM images of PNIPAAm/CNT@PVDF after 20 times of use.

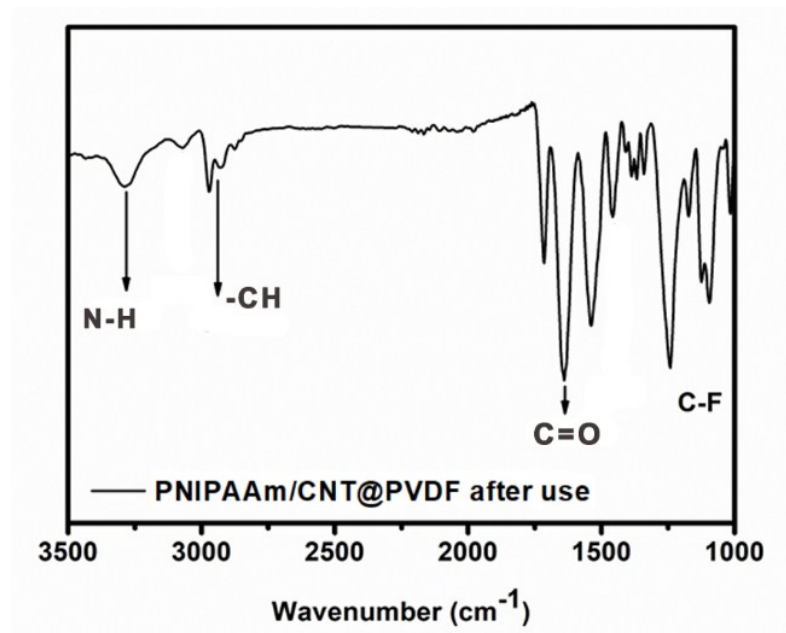

**Figure S10:** The FT-IR spectrum of PNIPAAm/CNT@PVDF after 20 times of use.

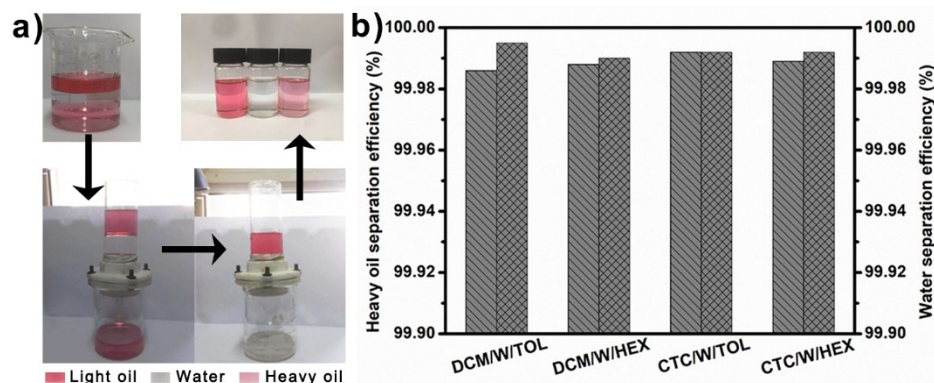

**Figure S11:** a) The continuous separation of multiphase immiscible liquids upon the IR variation and b) the separation efficiencies of PNIPAAm/CNT@PVDF for four kinds of multiphase immiscible liquids.

The special photothermal responsive property means the feasibility for multiphase immiscible liquids mixture separation. Therefore, the proof-of-concept experiment was conducted as displayed in Figure S11a. A piece of the PNIPAAm/CNT@PVDF was fixed between two tetrafluoroethylene fixtures attached with glass tubes in the dead-end model filtration device. The layered mixture of light oil (dyed with oil red), pure water and heavy oil (also dyed with oil red) was poured into the device. By controlling the irradiation condition, the liquid channel was manually controlled, which allowed the multiphase immiscible liquids with different SSE penetrate the material in sequence. Herein, four different multiphase immiscible systems including DCM/W/TOL, DCM/W/HEX, CTC/W/TOL and CTC/W/HEX were utilized to measure the separation efficiency of the material (DCM: dichloromethane, CTC: carbon tetrachloride, W: water, HEX: n-hexane, TOL: toluene). The volume ratio of the three liquid is 1:1:1. As displayed in Figure S11b, the separation efficiencies for all the heavy oils are above 99.98 %, and the separation efficiencies for water are all above 99.99 %, which indicates the satisfactory multiphase immiscible liquids mixture separation property of PNIPAAm/CNT@PVDF based on the manually controllable liquid channel.
